# Supplementary material for: Safety and efficacy of fecal microbiota transplantation to treat and prevent recurrent Clostridioides difficile in cancer patients
Source: PubMed Central journal article supplement (PMC8489149; doi:10.7150/jca.59251), 2021-09-07
Supplement: jcav12p6498s1.pdf [file jcav12p6498s1.pdf]

**Supplemental Table 1. Demographic characteristics of patients by tumor type**

| Characteristic                                                     | Solid tumor<br>(n = 12) | Hematologic malignancy<br>(n = 7) |
|--------------------------------------------------------------------|-------------------------|-----------------------------------|
| Age, mean (SD), y                                                  | 65.7 (13.5)             | 66.2 (13.9)                       |
| Male sex, no. (%)                                                  | 3 (25%)                 | 5 (71%)                           |
| Race, no. (%)                                                      |                         |                                   |
| White                                                              | 10 (83%)                | 6 (86%)                           |
| Other                                                              | 2 (17%)                 | 1 (14%)                           |
| Concomitant comorbidities, no. (%)                                 | 9 (75%)                 | 7 (100%)                          |
| ECOG status, no. (%) (n =15)                                       |                         |                                   |
| 0-2                                                                | 8 (67%)                 | 6 (86%)                           |
| 3                                                                  | 1 (8%)                  | NA                                |
| Smoking, no. (%)                                                   | 8 (67%)                 | 2 (29%)                           |
| Concurrent immune checkpoint<br>inhibitor–induced colitis, no. (%) | 3 (25%)                 | NA                                |
| Cancer stage, no. (%)                                              |                         |                                   |
| II                                                                 | 1 (8%)                  | NA                                |
| III                                                                | 2 (17%)                 | NA                                |
| IV                                                                 | 7 (58%)                 | NA                                |
| Cancer status at time of FMT, no. (%)                              |                         |                                   |
| Remission                                                          | 2 (17%)                 | 2 (29%)                           |
| Stable disease                                                     | 5 (42%)                 | 4 (57%)                           |
| Progressive                                                        | 5 (42%)                 | 1 (14%)                           |

Overall mortality, no. (%)

3 (25%)

1 (14%)

---

ECOG, Eastern Cooperative Oncology Group; FMT, fecal microbiota transplantation; SD, standard deviation; NA, data is not available or could not be calculated.

| <b>Time period</b>     | <b>Patients without rCDI</b>                                                            | <b>Patients with rCDI</b>                                                                  |
|------------------------|-----------------------------------------------------------------------------------------|--------------------------------------------------------------------------------------------|
| Antibiotics during FMT | Nitrofurantoin<br><br>Azithromycin                                                      | Sulfamethoxazole and trimethoprim                                                          |
| Antibiotics post-FMT   | Sulfamethoxazole and trimethoprim<br><br>Amoxicillin<br><br>Piperacillin and tazobactam | Sulfamethoxazole and trimethoprim<br><br>Ciprofloxacin<br><br>Cefepime<br><br>Azithromycin |

**Supplemental Table 2. Antibiotics used during and after FMT**

---

Levofloxacin

Amoxicillin and clavulanate

---

FMT, fecal microbiota transplantation
